1  
2

3 Standing genetic variation of the *AvrPm17* avirulence gene in powdery mildew  
4 limits the effectiveness of an introgressed rye resistance gene in wheat

5

6 Marion C. Mueller<sup>†1</sup>, Lukas Kunz<sup>†1</sup>, Seraina Schudel<sup>1</sup>, Sandrine Kammerecker<sup>1</sup>, Jonatan  
7 Isaksson<sup>1</sup>, Michele Wyler<sup>1</sup>, Johannes Graf<sup>1</sup>, Alexandros G. Sotiropoulos<sup>1</sup>, Coraline R. Praz<sup>1</sup>,  
8 Thomas Wicker<sup>1</sup>, Salim Bourras<sup>\*1,2</sup>, Beat Keller<sup>\*1</sup>

9 <sup>1</sup>Department of Plant and Microbial Biology, University of Zurich, Zurich, Switzerland

10 <sup>2</sup>Department of Forest Mycology and Plant Pathology, Division of Plant Pathology, Swedish  
11 University of Agricultural Sciences, Uppsala, Sweden

12 † Authors contributed equally

13 \* Corresponding authors: Beat Keller, Salim Bourras

14 **Email:** bkeller@botinst.uzh.ch, salim.bourras@slu.se

15

16

## 17 **Keywords**

18 wheat, powdery mildew, resistance introgression, gene conversion, avirulence gene

19

## 20 **Author Contributions**

21 M.C.M., L.K., S.B. and B.K. wrote the paper. S.B., and B.K. coordinated the research. M.C.M., L.K.,  
22 S.B. and B.K. designed the research. M.C.M. and S.S. performed genetic analysis. M.C.M., L.K.,  
23 S.S. S.K. J.I. performed experiments. M.C.M, S.S., M.W., C.R.P. A.G.S, J.G. and T.W. performed  
24 bioinformatics analysis.

## 25 **This PDF file includes:**

26 Main Text  
27 Figures 1 to 5  
28

29 **Abstract**

30 Introgressions of chromosomal segments from related species into wheat are important sources of  
31 resistance against fungal diseases. The durability and effectiveness of introgressed resistance  
32 genes upon agricultural deployment is highly variable - a phenomenon that remains poorly  
33 understood as the corresponding fungal avirulence genes are largely unknown. Until its breakdown,  
34 the *Pm17* resistance gene introgressed from rye to wheat provided broad resistance against  
35 powdery mildew (*Blumeria graminis*). Here, we used QTL mapping to identify the corresponding  
36 wheat mildew avirulence effector *AvrPm17*. It is encoded by two paralogous genes that exhibit  
37 signatures of re-occurring gene conversion events and are members of a mildew sub-lineage  
38 specific effector cluster. Extensive haplovariant mining in wheat mildew and related sub-lineages  
39 identified several ancient virulent *AvrPm17* variants that were present as standing genetic variation  
40 in wheat powdery mildew prior to the *Pm17* introgression, thereby paving the way for the rapid  
41 breakdown of the *Pm17* resistance. QTL mapping in mildew identified a second genetic component  
42 likely corresponding to an additional resistance gene present on the 1AL.1RS translocation carrying  
43 *Pm17*. This gene remained previously undetected due to suppressed recombination within the  
44 introgressed rye chromosomal segment. We conclude that the initial effectiveness of 1AL.1RS was  
45 based on simultaneous introgression of two genetically linked resistance genes. Our results  
46 demonstrate the relevance of pathogen-based genetic approaches to disentangle complex  
47 resistance loci in wheat. We propose that identification and monitoring of avirulence gene diversity  
48 in pathogen populations becomes an integral part of introgression breeding to ensure effective and  
49 durable resistance in wheat.

50 **Significance Statement**

51 Domesticated and wild wheat relatives provide an important source of new immune receptors for  
52 wheat resistance breeding against fungal pathogens. The durability of these resistance genes is  
53 variable and difficult to predict, yet it is crucial for effective resistance breeding. We identified a  
54 fungal effector protein recognised by an immune receptor introgressed from rye to wheat. We found  
55 that variants of the effector allowing the fungus to overcome the resistance are ancient. They were  
56 already present in the wheat powdery mildew gene pool before the introgression of the immune  
57 receptor and are therefore responsible for the rapid resistance breakdown. Our study demonstrates  
58 that the effort to identify new resistance genes should be accompanied by studies of avirulence  
59 genes on the pathogen side.

60

61

62 **Main Text**

63

64 **Introduction**

65

66 Wheat is the most widely cultivated food crop and is susceptible to a number of fungal diseases.  
67 For more than a century, breeding for genetically resistant cultivars that can durably withstand  
68 disease has been one of the most important approaches for sustainable wheat production globally.  
69 Introgressions of chromosomal segments from closely related wild grasses such as *Aegilops* or  
70 *Agropyron* species (1, 2) and other crop species such as rye (*Secale cereale*) have been highly  
71 valuable sources of new resistance gene specificities (3). Specifically, the 1BL.1RS or 1AL.1RS  
72 translocations of the rye chromosome 1R introgressed into hexaploid (AABBDD) wheat (reviewed  
73 in (4)) were of great relevance for wheat resistance breeding. Genes present on these  
74 translocations are widely used in wheat breeding and confer resistance to leaf rust (*Lr26*), stripe  
75 rust (*Yr9*), stem rust (*Sr31*, *Sr50/SrR*, *Sr1R<sup>Amigo</sup>*) and powdery mildew (the allelic *Pm8/Pm17* pair),  
76 (5, 6).

77 It has been proposed that introgressed resistance genes provide more effective and potentially  
78 more durable resistance since pathogens specialized on wheat have previously not been exposed  
79 and therefore have not adapted to the resistance specificities that evolved in other species (7). This  
80 is exemplified by the rye *Sr31* gene, which was deployed worldwide. It provided effective and broad  
81 resistance against *Puccinia graminis* f. sp. *tritici* the causal agent of wheat stem rust for over 30  
82 years before being overcome by the virulent African strain Ug99 (8), demonstrating both the huge  
83 benefit of an introgressed rye gene as well as the constant need for new broadly active resistance  
84 genes (9). In contrast to *Sr31* and the general hypothesis, many introgressed resistance genes  
85 were overcome quickly by wheat pathogens (10). For example, the rye introgressions with *Pm8*  
86 and *Pm17* became ineffective against wheat powdery mildew *Blumeria graminis* f. sp. *tritici* (*B.g.*  
87 *tritici*) within a few years after their deployment in large-scale agricultural settings (11-14). Thus, it  
88 remains one of the most pressing questions in the field of plant breeding research why a few  
89 introgressed genes such as *Sr31* remained effective over a long timeframe and despite worldwide  
90 deployment whereas others are overcome quickly (7).

91 The allelic *Pm8* and *Pm17* genes encode for nucleotide-binding leucine rich repeat (NLR) proteins  
92 that were introgressed into wheat from 'Petkus' and 'Insave' rye cultivars respectively (15, 16). It  
93 was demonstrated that both genes represent rye homologs of the wheat *Pm3* resistance gene (15,  
94 16) which encodes for a high number of different NLR alleles that confer race-specific resistance  
95 against wheat powdery mildew through recognition of mildew encoded avirulence proteins (17-19).

96 In wheat powdery mildew recent studies using map-based cloning, GWAS and effector  
97 benchmarking approaches have identified several avirulence genes, among them *AvrPm3<sup>a2/f2</sup>*,

98 *AvrPm3<sup>b2/c2</sup>* and *AvrPm3<sup>d3</sup>* recognized by *Pm3a/Pm3f*, *Pm3b/Pm3c* and *Pm3d* respectively (17,  
99 18). Sequence analysis of wheat mildew *Avr* genes revealed that they all encode small secreted  
100 candidate effector proteins (17, 18, 20, 21) and exhibit high levels of sequence variation on a  
101 population level including the independent evolution of numerous gain of virulence alleles by  
102 diverse molecular mechanisms (17, 18, 20, 22). The identification and functional characterization  
103 of mildew avirulence genes has therefore significantly broadened our understanding of race-  
104 specific resistance and resistance gene breakdown in the wheat – mildew pathosystem.

105 Grass powdery mildews exist in many sub-lineages also called *formae speciales* (*f.sp.*) that are  
106 highly host specific such as mildew on wheat (*B.g. tritici*), rye (*B. g. secalis*) or the wheat/rye hybrid  
107 triticale (*B.g. triticale*) which emerged recently and was attributed to a hybridization event between  
108 wheat and rye mildew sub-lineages (23, 24). Due to the strict host barrier, it is assumed that non-  
109 adapted mildew sub-lineages have not been exposed to NLR resistance specificities of an  
110 incompatible host and therefore have not evolved to evade recognition. Indeed, several *Pm3* alleles  
111 have been found to contribute to non-host resistance through recognition of conserved avirulence  
112 effectors in non-adapted mildew sub-lineages such as *B.g. secalis* (18). Given these observations,  
113 the rapid breakdown of *Pm8* and *Pm17* resistance after introgression into wheat remains puzzling  
114 and provides an opportunity to study evolutionary dynamics of wheat mildew in the context of  
115 introgression breeding. The *Pm17* introgression is especially suited for this purpose since the  
116 associated 1AL.1RS translocation, first described in 1976 in Oklahoma (US) (25), was not used  
117 before the end of the 20<sup>th</sup> and has been deployed in large-scale agricultural setting only in the  
118 beginning of the 21<sup>th</sup> century in the United States, where it provided resistance against wheat  
119 mildew in bread wheat (26, 27). In contrast, the deployment in other wheat growing areas globally  
120 started only after the year 2000 (11, 27-29), and breakdown of *Pm17* resistance was generally  
121 observed within few years and has been well documented in several wheat growing regions such  
122 as the US, China and Switzerland (11, 13, 27, 30).

123 In this study we report the molecular basis underlying the resistance breakdown of the introgressed  
124 *Pm17* gene in wheat. Using QTL mapping in a bi-parental mildew population we demonstrate that  
125 the corresponding avirulence effector *AvrPm17* is encoded by a paralogous effector gene pair,  
126 residing in a dynamic effector cluster, specific to the wheat and rye mildew sub-lineages. Moreover,  
127 we describe the identification of numerous ancient virulence alleles of the *AvrPm17* gene that have  
128 been present as standing genetic variation in *B.g. tritici* even before the introgression of *Pm17* into  
129 the wheat breeding pool. Lastly, we provide genetic evidence for the existence of a so far  
130 unidentified resistance gene against wheat mildew which was co-introgressed with *Pm17* from rye,  
131 which could be revealed through careful dissection of resistance specificities based on genetic  
132 studies in the pathogen.

133 **Results**

134

135 ***QTL mapping identifies a single avirulence locus for Pm17 in wheat powdery mildew***

136 To understand the breakdown of the rye NLR *Pm17* in wheat we aimed at identifying its  
137 corresponding avirulence gene by taking advantage of the recent cloning of *Pm17* and its validation  
138 in transgenic wheat lines (16). We used a preexisting, sequenced F1 mapping population derived  
139 from a cross of the avirulent *B.g. triticales* isolate THUN-12 and *B.g. tritici* isolate Bgt\_96224 which  
140 exhibits a virulent phenotype on the independent transgenic lines Pm17#34 and Pm17#181 (Fig.  
141 S1A,B), (31). A single interval QTL mapping approach using 55 randomly selected progeny of the  
142 Bgt\_96224 X THUN-12 cross identified a single locus on chromosome 1 at identical map position  
143 (164.8cM) with highly significant LOD scores of 9.2 for wheat genotype Pm17#34 and 7.0 for  
144 Pm17#181 respectively (Fig. 1A-C, Fig S1C,D, Table S1). The pericentromeric location of the  
145 mapped *AvrPm17* locus contrasts with the location of previously identified wheat mildew avirulence  
146 genes that tend to reside near the telomeric region or on the chromosome arms (Fig. 1B, Fig. S2,  
147 (17, 18, 20)).

148 To identify *AvrPm17* candidate genes we analysed the physical region underlying the QTL (with a  
149 confidence interval of 1.5 LOD) on chromosome 1 in the chromosome-scale assemblies of the  
150 parental isolates Bgt\_96224 and THUN-12 ((31), unpublished data). The genetic confidence  
151 interval corresponded to a 61.8kb region in the assembly of THUN-12 and a much larger region of  
152 114.3 kb in the assembly of Bgt\_96224. This striking difference in size is explained by a large 50kb  
153 deletion in the THUN-12 genome (Fig. 1D-F). The interval in the *Pm17* avirulent isolate THUN-12  
154 encodes only encodes a paralogous effector gene pair *BgTH12-04537* and *BgTH12-04538* (Fig.  
155 1E). The two effector genes encode for identical proteins that differ by two synonymous single  
156 nucleotide polymorphisms (SNPs). The two gene copies are encoded by two inverted duplicated  
157 segments of 2'300bp separated by a 4'769bp intergenic region (Fig. 1F). The corresponding gene  
158 duplication is also present in the corresponding region of the virulent parent Bgt\_96224. There, the  
159 duplicated effector genes *Bgt-51729* and *Bgt-51731* are identical and each carries two amino acid  
160 changes (A53V, R80S) compared to *BgTH12-04537* and *BgTH12-04538* respectively (Fig. 1D-E,  
161 Fig. 2A, Fig. S3). The interval in the Bgt\_96624 genome encodes an additional effector gene;  
162 *BgtAcSP-31098* that lies within the 50kb deleted region in THUN-12. In the absence of additional  
163 genes in the locus of the avirulent parent THUN-12 we predicted that *BgTH12-04537* and *BgTH12-*  
164 *04538* encode for *AvrPm17*. Using RNA-seq data from the parental isolates we found that *BgTH12-*  
165 *04537/BgTH12-04538* and *Bgt-51729/Bgt-51731* are highly expressed at early stages of infection  
166 corresponding to the establishment of the haustorial feeding structure at 2dpi, reminiscent of other  
167 wheat mildew *Avr* genes (Fig. S4 and S5). The *AvrPm17* candidates are not differentially expressed

168 (logFC<1.5, Fig. S4) therefore indicating that the amino acid polymorphisms observed between  
169 Bgt\_96224 and THUN-12 must account for the difference in phenotype.

170 A previous study found that the hybrid genome of *B.g. triticale* isolates consists of distinct genomic  
171 segments inherited from either wheat or rye mildew (23). Due to the rye origin of the *Pm17*  
172 resistance gene, the origin of the avirulence locus in triticales mildew THUN-12 is of special interest.  
173 Following the approach of (23) based on the analysis of fixed polymorphism between wheat and  
174 rye mildew, we found that the physical region underlying the *AvrPm17* QTL in THUN-12 is a  
175 segment inherited from wheat mildew (Fig. S6A-C). This indicates that that the rye *Pm17* gene  
176 recognises an avirulence component originating from the non-adapted wheat powdery mildew  
177 donor and not from the adapted rye mildew, in the triticales mildew hybrid.

178

### 179 **Functional validation of *AvrPm17***

180 To functionally validate *AvrPm17*, we transiently co-expressed the *BgTH12-04537/BgTH12-04537*  
181 *Avr* candidate with *Pm17*-HA in *Nicotiana benthamiana* by *Agrobacterium tumefaciens* mediated  
182 transient overexpression (18, 20). All effector constructs were expressed without the signal peptide  
183 and codon-optimized for expression in *N. benthamiana* to ensure optimal translation *in planta*.  
184 *BgTH12-04537/BgTH12-04538* elicited a strong hypersensitive response (HR) upon co-expression  
185 with *Pm17*-HA but not when expressed alone, confirming that these paralogous effector genes are  
186 *AvrPm17* (Fig. 2B,C). Co-expression of *AvrPm17\_THUN12* with either the *Pm8* gene from rye or  
187 the *Pm17* orthologues from wheat (*Pm3a-f*, *Pm3CS*) did not result in a hypersensitive response in  
188 *N. benthamiana* (Fig. S7), demonstrating the specificity of *AvrPm17\_THUN-12* recognition by  
189 *Pm17*.

190 Interestingly-co-expression of *AvrPm17\_96224* with *Pm17*, also resulted in a hypersensitive  
191 response. The extent of cell-death was however significantly reduced compared to the  
192 *AvrPm17\_THUN12* variant (paired Wilcoxon rank test p=0.0048) (Fig. 2D). We therefore concluded  
193 that *Pm17* can weakly recognise *AvrPm17\_96224*, at least in a heterologous overexpression  
194 system. To address the question whether the weak recognition of *AvrPm17\_96224* translates into  
195 phenotypes on *Pm17* wheat we made use of the above-mentioned transgenic lines *Pm17#181* and  
196 *Pm17#34* which were previously shown to exhibit differences in PM17 protein abundance with  
197 *Pm17#181* representing the stronger line (16). Consistent with a prediction of a quantitative  
198 difference in AVR recognition, we observed reduced leaf coverage by mildew upon infection of the  
199 strong line *Pm17#181* with isolate 96224 and with progeny of the 96224 X THUN-12 cross carrying  
200 the *AvrPm17\_96224* haplotype (Fig. S1A-D), thus indicating that a residual recognition of  
201 *AvrPm17\_96224* by transgenic *Pm17* overexpression is sufficient to reduce disease severity



202 quantitatively. In contrast, the recognition of the *AvrPm17\_THUN12* haplotype conferred complete  
203 disease resistance in both transgenic lines (Fig. S1A,B,D). Taken together these findings  
204 demonstrate that while the *Pm17* resistance in wheat genetically follows a classic gene-for-gene  
205 interaction model, phenotypic differences in *Pm17* mediated resistance is not only determined by  
206 sequence polymorphism in the AVR but also by *Pm17* expression levels.

207 We therefore also analysed differences in AVR protein abundance using C-terminal FLAG epitope  
208 tagged AVRPM17 variants from Bgt\_96224 and THUN-12. The presence of the FLAG epitope  
209 partially interfered with *AvrPm17* recognition since tagged versions exhibited significantly reduced  
210 HR levels when co-expressed with *Pm17*, however the specificity was not affected (Fig. S8A-D).  
211 Both AVRPM17-FLAG variants as well as PM17-HA were detectable on a Western blot (Fig. 2E,  
212 Fig. S8E-F). Interestingly, expression of AVRPM17\_THUN12 in *N. benthamiana* resulted in higher  
213 protein abundance than for the weakly recognized AVRPM17-96224 variant (Fig. 2E). This  
214 suggests that the amino acid polymorphisms between 96224 and THUN-12 affect protein stability  
215 of AVRPM17 and therefore contribute to the differential recognition of the AVRPM17 variants by  
216 PM17, thus further demonstrating that protein expression levels of AVR and NLR variants are  
217 additional determinants underlying the seemingly binary gene-for-gene genetic determinism of  
218 immunity based on major R genes. Similar observations were recently described for *AvrPm3<sup>a2/f2</sup>*,  
219 where polymorphism in the AVR were found to affect protein amount and thereby directly influence  
220 recognition by *Pm3a* (32).

221 AVRPM17 is part of effector family E003, the second largest effector family found in *Blumeria*  
222 *graminis* (31). The family is comprised of small proteins of c.a. 110 amino acids that contain a  
223 predicted signal peptide, an N-terminal Y/FxC motif followed by a stretch of alternating hydrophobic  
224 residues as well as a conserved carboxy-terminal cysteine (Fig. S9). These features have been  
225 described for numerous *Blumeria* effectors, including all functionally characterized AVR proteins in  
226 wheat mildew (18, 20, 21). Using an *in silico* modelling approach based on IntFOLD5.0, we found  
227 that AVRPM17 is predicted to exhibit a ribonuclease-fold (pvalue = 1.145E-4), consisting of a single  
228  $\alpha$ -helix and three  $\beta$ -strands (Fig. S10A,B). A similar ribonuclease-fold was experimentally  
229 determined by crystallization for the barley powdery mildew (*B.g. hordei*) effector BEC1054 (33)  
230 and proposed for AVRA7, the avirulence gene of the barley NLR Mla7 (34). *Avra7* is part of the  
231 *AvrPm17* gene family (E003) (Fig. S11), suggesting that the ribonuclease-fold is conserved within  
232 the effector family. The particular arrangement of  $\alpha$ -helix and  $\beta$ -strands has been predicted  
233 for other AVR proteins in wheat mildew. Most importantly such a pattern was described for the  
234 entire effector families E008, E018 and E034 encoding *AvrPm3<sup>a2/f2</sup>*, *AvrPm3<sup>b2c2</sup>* and *AvrPm3<sup>d3</sup>*  
235 respectively (18). We therefore hypothesize that *AvrPm17* and the *AvrPm3*'s encode for structurally  
236 similar proteins, despite little similarity on the primary amino acid sequences (Fig. S12) suggest

237 that the wheat *Pm3* allelic series and its rye orthologue *Pm17* recognise structurally related  
238 effectors.

239 ***AvrPm17* is encoded in a mildew sub-lineage specific effector cluster and exhibits signs of**  
240 **re-occurring gene conversion events**

241 Candidate effector genes in wheat and barley powdery mildew have been grouped into 235 families  
242 based on sequence similarity (31). *AvrPm17* belongs to family E003 which is represented with 69  
243 members in *B.g. tritici* (isolate Bgt\_96224), 70 members in *B.g. triticales* (isolate THUN-12) and 59  
244 members in *B.g. hordei* (isolate DH14) ((31),(34)). E003 is physically organized in gene clusters  
245 distributed over seven of the eleven chromosomes of wheat and triticales mildew (Fig. S11). Family  
246 members encoded in the same chromosomal location form phylogenetically related clades,  
247 consistent with the previously proposed expansion mechanism of effector genes through local  
248 duplication ((22), Fig. S11). Interestingly, the *AvrPm17* clade is encoded in a gene cluster that  
249 spans more than 1.3Mb on chromosome 1 and contains 7 and 8 members in triticales and wheat  
250 mildew respectively, as well as a solitary family member on chromosome 8 (Fig. 3A,B). The locus  
251 also harbours an additional effector cluster from family E011, consisting of eleven members, that  
252 has expanded within the E003 cluster (Fig. 3B). To study the evolutionary history of the *AvrPm17*  
253 clade, we identified the region corresponding to the *AvrPm17* cluster on scaffold\_27 in barley  
254 mildew isolate DH14 based on conserved syntenic flanking genes. Strikingly, the region in DH14  
255 is only 200kb in size and harbours only two E003 family members of the *AvrPm17* clade as well as  
256 a single effector from family E011 (Fig. 3B). This indicates both effector clades have been  
257 significantly expanded in wheat mildew after the divergence from the barley mildew lineage (Fig.  
258 3B). Using re-sequencing data from five rye mildew strains we could also show that rye mildew has  
259 six out of the eight E003 family members in the clade, whereas it lacks most of the E011 genes  
260 (Fig 3B), indicating that the E003 expansion has happened in a progenitor of rye/wheat mildew  
261 whereas the E011 family expansion in this region is wheat mildew specific. Strikingly, rye mildew  
262 does not encode for an *AvrPm17* gene, consistent with the virulent phenotype of the five rye mildew  
263 isolates on the *Pm17*-donor line 'Insave' (Fig. S13). This suggests that *AvrPm17* was lost in rye  
264 mildew likely due to the selection pressure imposed by the *Pm17* gene in the rye gene pool.

265 Given the highly dynamic genomic context of the *AvrPm17* locus, it is striking that the avirulent  
266 AVRPM17\_THUN12 variant and the partial gain-of-virulence variant AVPM17\_96224 are encoded  
267 by near identical (*BgTH12-04537/BgTH12-04538*, two synonymous SNPs) or identical (*Bgt-51729/*  
268 *Bgt-51731*) paralogous gene copies within the isolates THUN-12 and 96224, respectively (Fig.  
269 S14). Most importantly, the three non-synonymous SNPs that differentiate *AvrPm17\_96224* from  
270 the avirulent *AvrPm17\_THUN12* are identical in both genes *Bgt-51729* and *Bgt-51731* (Fig. 3C).  
271 Congruently there is an identical SNP in the intron of *Bgt-51729* and *Bgt-51731*. It is highly unlikely



272 that the exact same four mutations have occurred independently in both genes, indicating a recent  
273 gene duplication in each isolate. However, the duplicated region in Bgt\_96224 and THUN-12 is  
274 identical in size and position and therefore must have occurred in the ancestor of the two isolates  
275 (Fig. 3C). Consistent with the hypothesis of a more ancient duplication event we found that flanking  
276 regions of the duplication are significantly more divergent and contain two insertions (Fig. 3D/E,  
277 Fig. S15,16, Supplementary Text 1). These findings further demonstrate that the duplication is older  
278 than estimated based on the highly similar genic sequences. Therefore, the nucleotide  
279 polymorphisms defining the differences between *AvrPm17\_THUN12* and *AvrPm17\_96224* have  
280 most probably occurred in one gene copy and were then transferred to its duplicate by gene  
281 conversion (for further details see Supplementary Text 1). We propose that gene conversion  
282 event(s) contribute to the evolutionary potential of *AvrPm17* as an efficient way to transfer beneficial  
283 mutations to both gene copies.

#### 284 **Virulent *AvrPm17* haplovariants are ancient and predate *Pm17* introgression into wheat**

285 A haplotype mining approach in a diversity panel of 160 re-sequenced isolates of wheat mildew  
286 (138) and triticale mildew (22 isolates) for *AvrPm17* revealed there are three dominant AVRPM17  
287 variants in the gene pool (Fig. 4A,B). Two of these are the above-described AVPM17\_THUN12  
288 (varA) and the weakly recognized AVPM17\_96224 (varB). The most frequent haplotype is varC  
289 that contains a single amino acid polymorphism (A53V) and induces weaker HR in the *Nicotiana*  
290 co-expression assays as compared to the functional varA found in THUN-12 (Fig. 4C). In addition,  
291 eleven isolates originating from China encode for the only complete loss-of-recognition haplotype  
292 found (varD) with three amino acid changes (A53V, E55R, G61A) compared to varA (Fig. 4A-C,  
293 Fig. S17). Strikingly, 93% of the isolates with two *AvrPm17* copies encode for two identical mature  
294 AVRPM17 proteins in one of the following combinations; varA/varA, varB/varB and varC/varC (Fig.  
295 4B). This supports the hypothesis that the *AvrPm17* gene copies are kept identical by recurring  
296 gene conversion events (for details see Supplementary Text 2, Fig. S14-16, S18-19, Table S2).

297 We selected a set of 16 representative isolates covering the diversity of *AvrPm17* in wheat mildew  
298 (varA-varD), verified *AvrPm17* expression during early stages of infection (i.e. haustorial stage, Fig.  
299 S20) and analyzed their virulence phenotype on *Pm17* transgenics. Consistent with the recognition  
300 strength in *N. benthamiana*, representative isolates encoding for *AvrPm17\_varD* were fully virulent  
301 and isolates carrying *varA*, with the exception of one isolate, were avirulent on the transgenic *Pm17*  
302 lines (Table S3). Isolates carrying the weakly recognized variants *AvrPm17\_varB* and  
303 *AvrPm17\_varC* displayed intermediate phenotypes on the transgenic lines (Table S3). Thus, the  
304 recognition strength of *AvrPm17* haplovariants observed in *N. benthamiana* largely correlated with  
305 disease resistance in wheat thereby confirming the biological relevance of the heterologous  
306 *Nicotiana* system to study quantitative effects of *Avr* recognition by resistance genes. Furthermore,

307 these findings indicate that *AvrPm17\_varD* and *AvrPm17\_varB/varC* indeed represent virulence or  
308 partial virulence alleles respectively, that are likely responsible for the resistance breakdown of the  
309 *Pm17* gene in wheat.

310 Both partially virulent variants *varB* and *varC* were present in all major subpopulations (i.e. China,  
311 Europe, Israel, USA) (Fig. 4B). Given their global distribution and considering that some of the  
312 isolates were collected already in the 1990's (SI appendix Dataset 3) this suggests that the partially  
313 virulent *AvrPm17* variants *varB* and *varC* were present as standing genetic variation in the wheat  
314 mildew population before large-scale agricultural deployment of wheat varieties carrying the *Pm17*  
315 introgression at the beginning of the 21<sup>st</sup> century in the US, and only subsequently in other regions  
316 of the world (27, 29). To further test this hypothesis, we extended our haplotype analysis to closely  
317 related *formae speciales* of *B.g. tritici*. Due to their distinct host range, *B.g. dicocci*, a *forma specialis*  
318 sampled on wild tetraploid wheat and *B.g. dactylidis* infecting the wild grass *Dactylidis glomerata*  
319 (23, 35) are unlikely to have previously been exposed to the *Pm17* resistance gene. Strikingly, we  
320 found that three isolates of *B.g. dicocci*, encode up to two copies of *AvrPm17\_varB* (Fig. 4B).  
321 Furthermore, we found three additional haplovariants (*varE-G*) specific to *B.g. dicocci*. Co-  
322 expression of *varE-G* with *Pm17* in *N. benthamiana* resulted in significantly weaker HR responses  
323 compared to *AvrPm17\_varA*, indicating these variants also represent partially virulent alleles (Fig.  
324 4C). This is consistent with the observation that these haplovariants share the A53V, R80S  
325 mutation (*varE,G*) or the A53V mutation (*varF*) with *AVRPM17\_varB* (Fig. 4A). Since *B.g. dicocci*  
326 does not grow on most hexaploid wheat cultivars, including 'Bobwhite' (23) we could not test the  
327 contribution of the *varE-G* recognition to *Pm17* virulence. In *B.g. dactylidis*, represented by two  
328 isolates, we found an additional haplovariant *AvrPm17\_varBgd* which carries two substitutions  
329 (A53V and G61A) compared to *AvrPm17\_varA* and is only very weakly recognized by *Pm17* in *N.*  
330 *benthamiana* (Fig. 4A/C). Most importantly, these mutations are shared with the non-recognised  
331 Chinese haplotype *AvrPm17\_varD*, demonstrating that (i) the E55R substitution in the Chinese  
332 haplotype is the causative mutation leading to complete loss-of-recognition by *Pm17* (Fig. 4C, Fig.  
333 S17) and (ii) that part of the *AvrPm17* diversity found in wheat mildew is ancient and predates the  
334 split of *B.g. tritici* and *B.g. dactylidis*. Taken together we found that a significant proportion of the  
335 *AvrPm17* sequence diversity found in *B.g. tritici*, including several gain of virulence mutations, is  
336 shared with its closely related *formae speciales* *B.g. dicocci* or *B.g. dactylidis*. Combined with the  
337 observation of a global distribution of partially virulent *AvrPm17* variants B and C and their presence  
338 in isolates collected before the deployment of *Pm17* wheat in agriculture, our findings strongly  
339 indicate that these *AvrPm17* gain of virulence mutations represent standing genetic variation in  
340 wheat mildew which predates precedes the introgression of *Pm17* into wheat.

341 While the existence of numerous virulent or partially virulent *AvrPm17* haplotypes in the global  
342 mildew population prior to *Pm17* introgression might explain rapid *Pm17* resistance breakdown this

343 observation is hardly compatible with the initially described broad resistance phenotype exerted by  
344 the 1AL.1RS translocation. Based on these considerations we therefore propose the 1AL.1RS  
345 translocation to harbor a second mildew resistance gene in addition to *Pm17*.

### 346 **The 1RS.1AL translocation encodes for two powdery mildew resistance specificities**

347 To test for the predicted second resistance gene of the 1AL.1RS translocation, we characterized  
348 the genetic association of avirulence of the 96224 X THUN-12 mapping population on the original  
349 1AL.1RS translocation line 'Amigo' (16). The *Pm17* avirulent isolate THUN-12 showed an  
350 intermediate phenotype on 'Amigo', demonstrating that recognition of *AvrPm17\_varA* results in  
351 quantitative resistance in presence of the endogenous *Pm17* gene (Fig. 5A,B). In contrast, the  
352 *Pm17*-virulent isolate 96224 was avirulent on 'Amigo', indicating that (i) this isolate carries an  
353 additional avirulence component recognized by 'Amigo' and (ii) the 96224 X THUN-12 bi-parental  
354 population is suited to validate the second resistance specificity in 'Amigo' (Fig. 5C). Consistent  
355 with our hypothesis, a QTL mapping analysis based on 117 progeny of Bgt\_96224 X THUN12  
356 identified two significant QTLs associated with the avirulence phenotype on cultivar 'Amigo' (for  
357 details see Supplementary Text 3, Fig 5D, Table S4). One QTL on chromosome 1 corresponds to  
358 the *AvrPm17* locus thereby verifying the activity of the *Pm17* gene in the original translocation line  
359 'Amigo'. In addition, we identified a highly significant QTL on chromosome 9 that was not detected  
360 in the QTL analysis on the transgenic *Pm17* lines (Fig. 1A, Fig. 5D), likely encoding the avirulence  
361 component recognized by the predicted second resistance gene of the 1AL.1RS translocation. The  
362 confidence interval of the QTL on chromosome 9 encompasses 371 kb in the avirulent isolate  
363 96224 and harbors a total of 16 effector genes of which four are polymorphic compared to THUN-  
364 12 (Table S5, Fig. S21A). Upon co-expression with *Pm17* in *N. benthamiana* none of the effector  
365 candidates encoded by isolate Bgt\_96224 within the confidence interval elicited a hypersensitive  
366 response (Fig. S21B). This finding demonstrate that the second QTL on chromosome 9 is  
367 independent of the *Pm17* resistance specificity. Most importantly, only progeny of the cross that  
368 carry the *AvrPm17\_96224* haplovariant (*AvrPm17\_varB*) and the THUN-12 genotype in the QTL  
369 on chromosome 9 are fully virulent (Fig. 5D,5E), further demonstrating that the simultaneous  
370 presence of both virulence alleles is necessary to overcome the resistance on 'Amigo'.

371 We therefore conclude that the broad effectiveness of the 1AL.1RS translocation in providing  
372 resistance against wheat powdery mildew was based on two resistance gene specificities in the  
373 1AL.1RS translocation. Since the *Pm17* resistance specificity has been attributed to a single locus  
374 based on segregation analysis we hypothesize that the second locus is genetically linked on the  
375 1RS.1AL region and has previously been genetically masked due to repressed recombination  
376 frequently associated with introgressed segments in wheat (36).

377 In summary, we here demonstrate that the *Pm17* introgression is genetically complex and that such  
378 complexity could only be revealed through accurate genetic dissection of the avirulence  
379 determinants in the pathogen distinguishing the two resistance specificities.

380

381 **Discussion**

382

383 The recent identification of numerous *Avr* genes both in *B.g. tritici* and *B.g. hordei* has significantly  
384 advanced our understanding of NLR mediated resistance in the cereal powdery mildew  
385 pathosystem (17, 18, 20-22, 34, 37). The functional cloning of *Avr* genes not only allowed  
386 molecular studies on recognition mechanisms (32, 34) but has also set the ground for genetic  
387 studies based on the natural diversity of avirulence components in local and global mildew  
388 collections. This has led to the discovery of numerous gain of virulence mechanisms exerted by  
389 *Blumeria* pathogens, including single amino acid polymorphisms, truncations and deletions of *Avr*  
390 genes as well as a fungal encoded suppressor *SvrPm3* acting on *Pm3* mediated resistance  
391 through masking of AVRPM3 recognition (17, 18, 34). These findings highlight the importance of  
392 genetic and genomic studies in fungal plant pathogens in order to understand the mechanisms of  
393 resistance breakdown and allow us to adapt current breeding approaches towards more durable  
394 deployment of resistance genes in cereal crops.

395 With so far ten *Blumeria Avr* genes cloned and functionally characterized several patterns emerged.  
396 *Blumeria* AVR effectors were found to be small proteins with a length of 102-130 amino acids, to  
397 contain an N-terminal signal peptide, a largely conserved Y/FxC motif and a conserved cysteine  
398 residue towards the C-terminus (17, 18, 20-22, 34, 37) while otherwise exhibiting highly divergent  
399 amino acid sequences. Furthermore, wheat mildew *Avrs* were consistently among the highest  
400 expressed genes within their effector gene family, indicating high abundance in host cells upon  
401 secretion presumably influencing the efficacy of their virulence function alongside NLR mediated  
402 recognition in resistant cultivars (18). The newly identified *AvrPm17* exhibits all the above-  
403 mentioned characteristics of *Blumeria* AVR proteins and therefore further corroborates the emerging  
404 patterns.

405 Despite showing little homology to proteins with a known function, more than a hundred *Blumeria*  
406 effectors are predicted to exhibit a ribonuclease-like fold (20, 33, 34, 38, 39). Notably, such a  
407 ribonuclease-like structure has recently been confirmed by protein crystallization of the barley  
408 powdery mildew effector BEC1054 (33). Similarly, despite highly divergent amino acid sequences,  
409 *in silico* protein modeling approaches predicted ribonuclease-like folds for most of the functionally  
410 verified avirulence proteins in barley and wheat mildew (20, 21, 34), including all AVRPM3 effectors  
411 (18) and AVRPM17 (this study). Based on the homology between rye *Pm17* and wheat *Pm3* NLRs  
412 combined with the predicted structural similarities of their corresponding AVR proteins we propose  
413 a conserved recognition mechanism, likely leading to similar selection pressures acting on AVR  
414 genes for evasion of recognition.

415 Extensive haplovariant mining in a global wheat mildew collection for *AvrPm3<sup>a2/f2</sup>*, *AvrPm3<sup>b2/c2</sup>* and  
416 *AvrPm3<sup>d3</sup>* revealed that virulent alleles were exclusively based on single amino acid polymorphisms

417 (18, 22). Even though copy number variation was common, disruption or deletion of the avirulence  
418 gene, as observed for many other *AVRs* has never been detected. In line with these findings, our  
419 haplovariant mining approach for the paralogous *AvrPm17* copies in a comparable wheat mildew  
420 diversity panel also failed to identify gene deletions or non-sense mutations and in return found  
421 four variants varA-varD of which three represent partial or complete virulence alleles that are based  
422 on amino acid polymorphisms. In contrast, we found the *AvrPm17* genes deleted in rye mildew,  
423 suggesting different gain of virulence mechanisms in these closely related mildew sub-lineages,  
424 likely due to differences in the exposure to the *Pm17* gene.

425 Gene duplications in effector genes are common and considered advantageous for pathogens as  
426 they allow the independent diversification of virulence factors (31). However, the presence of  
427 identical avirulence gene copies can represent a major liability as gain of virulence mutations need  
428 to occur in both gene copies to effectively change the phenotypic outcome. This was described for  
429 wheat mildew *AvrPm3<sup>ds</sup>* in which gain of virulence mutations in one of the tandem duplicated gene  
430 copies was not sufficient to render the isolates virulent (18). Gene conversion, efficiently  
431 transferring beneficial mutations between gene copies, could provide pathogens with a molecular  
432 mechanism to mitigate the disadvantage of duplicated avirulence genes. Indeed, a case of gene  
433 conversion leading to gain of virulence was described for *Avr3c* in the oomycete *Phytophthora*  
434 *sojiae*, (40). Similarly, we found evidence for gene conversion to have occurred between the  
435 paralogous copies of *AvrPm17* (Supplementary Text 1 & 2). The high frequency of wheat mildew  
436 isolates encoding for varA/varA, varB/varB or varC/varC genotypes furthermore indicates repeated  
437 gene conversion events between the two paralogs. Whether this phenomenon is dependent on  
438 inherent predisposition of the locus to non-allelic gene conversion to occur or whether it reflects the  
439 existence of an additional selection pressure linked to the virulence function of *AvrPm17* to maintain  
440 the sequences identical will be subject to further studies.

441 It was hypothesized that introgressed *R* resistance genes provide effective and durable resistance  
442 by recognizing an effector gene which, in the absence of previously acting diversifying selection, is  
443 largely conserved (7). The opportunity to test this hypothesis for a fungal pathogen in wheat arose  
444 with the recent cloning of the introgressed stem rust resistance genes *Sr35* (from *T. monococcum*,  
445 (41)) and *Sr50* (from *Secale cereale*, (42)) and their corresponding avirulence genes *AvrSr35* and  
446 *AvrSr50* in *Puccinia graminis* f. sp. *tritici* (*Pgt*) (43, 44). Virulent alleles for both genes were identified  
447 in *Pgt* races with diverse geographic origins. Whether these virulent alleles emerged before the  
448 introgression of *Sr35* and *Sr50* into wheat or as a consequence of their agricultural use was  
449 however not assessed. The identification of partially or fully virulent *AvrPm17* haplovariants (varB-  
450 varD) in a geographically diverse set of wheat mildew isolates collected over the last three decades  
451 and the identification of *AvrPm17* homologs in closely related mildew sublineages provided a



452 unique opportunity to investigate a possible connection between the starting agricultural use of the  
453 *Pm17* introgression in wheat at the beginning of the 21<sup>st</sup> century and the emergence of virulent  
454 *AvrPm17* alleles in wheat mildew. Using (i) a global mildew population with a unique temporal  
455 resolution including many isolates that were collected before *Pm17* deployment or exhibit different  
456 host preferences (ii) careful phenotypic studies on transgenic *Pm17* lines, and (iii) functional studies  
457 of *Avr* recognition in transient protein expression assays, we could demonstrate that virulent  
458 *AvrPm17* variants were largely present in mildew populations prior to the deployment of *Pm17*. We  
459 propose that this genetic diversity has arisen from the evolutionary arms-race between *Blumeria*  
460 and its host species potentially tracing back to a *Pm17/Pm3*-like gene in the progenitor of rye and  
461 wheat. This hypothesis is corroborated by the fact that the *AvrPm17* gene is encoded in a highly  
462 expanded gene cluster of effector family E003, which is exclusive to wheat and rye mildew,  
463 suggesting that the expansion of this cluster evolved prior to the split of the two mildew lineages  
464 250'000 years ago (23). One of the mechanisms that is proposed to drive expansion of effector  
465 gene clusters is the continuous coevolution with the host immune system (45, 46). Thus, the  
466 presence of *Pm17/Pm3*-like genes in the progenitor of rye and wheat might have resulted in  
467 selection pressure leading to the expansion of the effector cluster on chromosome 1 in the  
468 progenitor of wheat and rye mildew, suggesting a long history of *R*-gene mediated effector evolution  
469 in natural ecosystems, long before the start of agricultural cultivation. Our findings highlight the  
470 importance for resistance durability to select introgressed resistance specificities based on the  
471 evolutionary history of donor and recipient species. In this work, we demonstrate the necessity to  
472 identify and monitor the genetic diversity of the corresponding avirulence factors in order to achieve  
473 effective and durable resistance. We propose that such studies are very timely, considering the  
474 current important efforts to introgress *R* genes into wheat from phylogenetically distant wild  
475 relatives or phylogenetically close diploid progenitor species.

476 An often-stated advantage of larger translocations from related species is the simultaneous  
477 introgression of several resistance specificities active against different plant pathogens such as the  
478 most widely deployed rye translocation 1BL.1RS from 'Petkus' carrying *Lr26*, *Yr9*, *Sr31* and *Pm8*  
479 (4). For effective and durable resistance, the introgression of several resistance genes active  
480 against the same pathogen is highly desirable. By extending the mildew QTL mapping approach  
481 from *Pm17* transgenic lines to the original 1RS.1AL translocation cultivar 'Amigo' we have found  
482 evidence for the presence of a second resistance gene potentially recognizing an avirulence gene  
483 of *B.g. tritici* isolate Bgt\_96224. Historically the *Pm17* resistance associated with the 1RS.1AL  
484 translocation has been attributed to a single locus (47). The additional resistance specificity  
485 predicted by our QTL approach is therefore most likely genetically linked with the *Pm17* gene and  
486 has been missed by genetic approaches solely applied on the plant side due to suppressed  
487 recombination within the translocated genomic region originating from 'Insave' rye (36). The

488 simultaneous presence of two race-specific resistance genes in the 1RS.1AL translocation might  
489 explain the initially broad resistance exhibited by cultivars such as 'Amigo', despite the likely long-  
490 standing presence of several gain of virulence alleles for *AvrPm17* in the *B.g. tritici* population. The  
491 identification of this second so far unknown AVR/R gene pair in the future will potentially provide  
492 further answers regarding the initial efficacy but also the quick breakdown of the powdery mildew  
493 resistance encoded on the 1RS.1AL translocation.

494 Identification and cloning of introgressed resistance genes has often been hampered by the  
495 absence of recombination throughout parts or the entirety of the alien chromatin regions (48). In  
496 recent years several technological advances such as RenSeq or MutChromSeq approaches that  
497 do not rely on fine-mapping have helped to alleviate this phenomenon and led to the identification  
498 of numerous new resistance genes often residing in highly complex loci (49, 50). Here we show  
499 that genetic mapping populations of plant pathogens could provide an additional tool to dissect  
500 complex translocated genomic regions with low or absent recombination thereby complementing  
501 recently developed, plant-focused approaches.

## 502 **Materials and Methods**

503  
504 Detailed Material and Methods section is available as SI appendix. Constructs used in this study  
505 are listed in SI appendix Dataset 1. Primer sequences are listed in SI appendix Dataset 2. Details  
506 about powdery mildew isolates and their associated (SRA) accession numbers are listed in SI  
507 appendix Dataset 3. Phenotyping and subsequent QTL analysis are described in SI appendix  
508 section 1. Candidate identification is described in SI appendix section 2 Construction of the  
509 expression plasmids are described in SI appendix section 3. Transient expression procedure using  
510 *Agrobacterium tumefaciens* in *Nicotiana benthamiana* followed by hypersensitive response  
511 measurement are described in SI appendix section 4, western blot detection of tagged avirulence  
512 and resistance genes can be found in SI appendix section 5. Expression analysis can be found in  
513 Si appendix section 6. Bioinformatic analysis are detailed under SI appendix section 7. The  
514 Sequence of *Pm17* is available at GeneBank under the accession number AYD60116.1. *AvrPm17*  
515 haplovariants are available under the accession numbers XX-XX.

516

## 517 **Acknowledgments**

518

519 This work was supported by the University research priority program (URPP) "Evolution in Action"  
520 of the University of Zürich, Switzerland and the Swiss National Science Foundation grant number  
521 310030B\_182833. The authors would like to thank Prof. Daniel Croll from the University of  
522 Neuchâtel for helpful input on the topic of gene conversion.

523

524

525 **References**

526

- 527 1. P. Zhang *et al.*, "Wheat–Aegilops Introgressions In: Molnár-Láng M., Ceoloni C., Doležel  
528 J. (eds) Alien Introgression in Wheat." (Springer International Publishing, Cham, 2015),  
529 pp. 221-243.
- 530 2. C. Ceoloni, L. Kuzmanovic, P. Forte, M. E. Virili, A. Bitti, "Wheat-Perennial Triticeae  
531 Introgressions: Major Achievements and Prospects In: Molnár-Láng M., Ceoloni C.,  
532 Doležel J.(eds) Alien Introgression in Wheat." (Springer International Publishing, Cham,  
533 2015), pp. 273-313.
- 534 3. B. B. H. Wulff, M. J. Moscou, Strategies for transferring resistance into wheat: from wide  
535 crosses to GM cassettes. *Frontiers in Plant Science* **5**, 11 (2014).
- 536 4. L. A. Crespo-Herrera, L. Garkava-Gustavsson, I. Ahman, A systematic review of rye  
537 (*Secale cereale* L.) as a source of resistance to pathogens and pests in wheat (*Triticum*  
538 *aestivum* L.). *Hereditas* **154**, 1-9 (2017).
- 539 5. B. Friebe, J. Jiang, W. J. Raupp, R. A. McIntosh, B. S. Gill, Characterization of wheat-alien  
540 translocations conferring resistance to diseases and pests: Current status. *Euphytica* **91**,  
541 59-87 (1996).
- 542 6. R. Mago *et al.*, Identification and mapping of molecular markers linked to rust resistance  
543 genes located on chromosome 1RS of rye using wheat-rye translocation lines.  
544 *Theoretical and Applied Genetics* **104**, 1317-1324 (2002).
- 545 7. J. G. Ellis, E. S. Lagudah, W. Spielmeyer, P. N. Dodds, The past, present and future of  
546 breeding rust resistant wheat. *Frontiers in Plant Science* **5** (2014).
- 547 8. Z. A. Pretorius, R. P. Singh, W. W. Wagoire, T. S. Payne, Detection of virulence to wheat  
548 stem rust resistance gene Sr31 in *Puccinia graminis* f. sp. *tritici* in Uganda. *Plant Disease*  
549 **84**, 203-203 (2000).
- 550 9. M. Ravensdale, A. Nemri, P. H. Thrall, J. G. Ellis, P. N. Dodds, Co-evolutionary  
551 interactions between host resistance and pathogen effector genes in flax rust disease.  
552 *Molecular Plant Pathology* **12**, 93-102 (2011).
- 553 10. R. McIntosh, C. Wellings, R. Park, Wheat Rusts: An Atlas of Resistance Genes. *CSIRO*  
554 *Publishing* (1995).
- 555 11. C. Cowger, R. Parks, D. Marshall, Appearance of Powdery Mildew of Wheat Caused by  
556 *Blumeria graminis* f. sp. *tritici* on Pm17-Bearing Cultivars in North Carolina. *Plant Disease*  
557 **93**, 1219-1219 (2009).
- 558 12. C. Cowger, L. Mehra, C. Arellano, E. Meyers, J. P. Murphy, Virulence Differences in  
559 *Blumeria graminis* f. sp. *tritici* from the Central and Eastern United States.  
560 *Phytopathology* **108**, 402-411 (2018).
- 561 13. F.-s. Zeng *et al.*, Virulence and Diversity of *Blumeria graminis* f. sp. *tritici* Populations in  
562 China. *Journal of Integrative Agriculture* **13**, 2424-2437 (2014).
- 563 14. M. Heun, B. Friebe, Introgression of powdery mildew resistance from rye into wheat.  
564 *Phytopathology* **80**, 242-245 (1990).
- 565 15. S. Hurni *et al.*, Rye Pm8 and wheat Pm3 are orthologous genes and show evolutionary  
566 conservation of resistance function against powdery mildew. *Plant Journal* **76**, 957-969  
567 (2013).
- 568 16. S. P. Singh *et al.*, Evolutionary divergence of the rye Pm17 and Pm8 resistance genes  
569 reveals ancient diversity. *Plant Molecular Biology* **98**, 249-260 (2018).

- 570 17. S. Bourras *et al.*, Multiple Avirulence Loci and Allele-Specific Effector Recognition  
571 Control the Pm3 Race-Specific Resistance of Wheat to Powdery Mildew. *Plant Cell* **27**,  
572 2991-3012 (2015).
- 573 18. S. Bourras *et al.*, The AvrPm3-Pm3 effector-NLR interactions control both race-specific  
574 resistance and host-specificity of cereal mildews on wheat. *Nature Communications* **10**,  
575 2292 (2019).
- 576 19. S. Brunner *et al.*, Intragenic allele pyramiding combines different specificities of wheat  
577 Pm3 resistance alleles. *Plant Journal* **64**, 433-445 (2010).
- 578 20. C. R. Praz *et al.*, AvrPm2 encodes an RNase-like avirulence effector which is conserved in  
579 the two different specialized forms of wheat and rye powdery mildew fungus. *New*  
580 *Phytologist* **213**, 1301-1314 (2017).
- 581 21. T. Hewitt *et al.*, A highly differentiated region of wheat chromosome 7AL encodes a  
582 Pm1a immune receptor that recognises its corresponding AvrPm1a effector from  
583 *Blumeria graminis*. *New Phytologist* **n/a** (2020).
- 584 22. K. E. McNally *et al.*, Distinct domains of the AVRPM3(A2/F2) avirulence protein from  
585 wheat powdery mildew are involved in immune receptor recognition and putative  
586 effector function. *New Phytologist* **218**, 681-695 (2018).
- 587 23. F. Menardo *et al.*, Hybridization of powdery mildew strains gives rise to pathogens on  
588 novel agricultural crop species. *Nature Genetics* **48**, 201-205 (2016).
- 589 24. V. Troch, K. Audenaert, B. Bekaert, M. Hofte, G. Haesaert, Phylogeography and virulence  
590 structure of the powdery mildew population on its 'new' host triticale. *Bmc Evolutionary*  
591 *Biology* **12**, 76 (2012).
- 592 25. S. V. Rabinovich, Importance of wheat-rye translocations for breeding modern cultivars  
593 of *Triticum aestivum* L. (Reprinted from *Wheat: Prospects for global improvement*,  
594 1998). *Euphytica* **100**, 323-340 (1998).
- 595 26. R. Graybosch, G. Bai, P. S. Amand, G. Sarath, Persistence of rye (*Secale cereale* L.)  
596 chromosome arm 1RS in wheat (*Triticum aestivum* L.) breeding programs of the Great  
597 Plains of North America. **66**, 941-950 (2019).
- 598 27. R. Parks, I. Carbone, J. P. Murphy, D. Marshall, C. Cowger, Virulence structure of the  
599 Eastern US wheat powdery mildew population. *Plant Disease* **92**, 1074-1082 (2008).
- 600 28. A. J. Lukaszewski, Frequency of 1RS.1AL and 1RS.1BL Translocations in United-States  
601 Wheats. *Crop Science* **30**, 1151-1153 (1990).
- 602 29. A. J. Lukaszewski, "Introgressions Between Wheat and Rye In: Molnár-Láng M., Ceoloni  
603 C., Doležel J. (eds) *Alien Introgression in Wheat*". (Springer International Publishing,  
604 Cham, 2015), pp. 163-189.
- 605 30. F. Mascher *et al.* (2012) Virulenzmonitoring und Populationsstruktur des Echten  
606 Mehltaus von 2003 bis 2010. (Agrarforschung Schweiz), pp 236–243.
- 607 31. M. C. Müller *et al.*, A chromosome-scale genome assembly reveals a highly dynamic  
608 effector repertoire of wheat powdery mildew. *New Phytologist* **221**, 2176-2189 (2019).
- 609 32. S. Lindner *et al.*, Single residues in the LRR domain of the wheat PM3A immune receptor  
610 can control the strength and the spectrum of the immune response. *Plant Journal*  
611 (2020).
- 612 33. H. G. Pennington *et al.*, The fungal ribonuclease-like effector protein CSEP0064/BEC1054  
613 represses plant immunity and interferes with degradation of host ribosomal RNA. *Plos*  
614 *Pathogens* **15** (2019).
- 615 34. I. M. L. Saur *et al.*, Multiple pairs of allelic MLA immune receptor-powdery mildew  
616 AVR(A) effectors argue for a direct recognition mechanism. *Elife* **8** (2019).

- 617 35. F. Menardo, T. Wicker, B. Keller, Reconstructing the Evolutionary History of Powdery  
618 Mildew Lineages (*Blumeria graminis*) at Different Evolutionary Time Scales with NGS  
619 Data. *Genome Biology and Evolution* **9**, 446-456 (2017).
- 620 36. E. L. Olson *et al.*, Genotyping of US Wheat Germplasm for Presence of Stem Rust  
621 Resistance Genes Sr24, Sr36 and Sr1RS(Amigo). *Crop Science* **50**, 668-675 (2010).
- 622 37. X. L. Lu *et al.*, Allelic barley MLA immune receptors recognize sequence-unrelated  
623 avirulence effectors of the powdery mildew pathogen. *Proceedings of the National  
624 Academy of Sciences of the United States of America* **113**, E6486-E6495 (2016).
- 625 38. P. D. Spanu, Cereal immunity against powdery mildews targets RNase-Like Proteins  
626 associated with Haustoria (RALPH) effectors evolved from a common ancestral gene.  
627 *New Phytologist* **213**, 969-971 (2017).
- 628 39. C. Pliego *et al.*, Host-Induced Gene Silencing in Barley Powdery Mildew Reveals a Class  
629 of Ribonuclease-Like Effectors. *Molecular Plant-Microbe Interactions* **26**, 633-642  
630 (2013).
- 631 40. S. Dong *et al.*, The *Phytophthora sojae* Avirulence Locus Avr3c Encodes a Multi-Copy  
632 RXLR Effector with Sequence Polymorphisms among Pathogen Strains. *Plos One* **4**  
633 (2009).
- 634 41. C. Saintenac *et al.*, Identification of Wheat Gene Sr35 That Confers Resistance to Ug99  
635 Stem Rust Race Group. *Science* **341**, 783-786 (2013).
- 636 42. R. Mago *et al.*, The wheat Sr50 gene reveals rich diversity at a cereal disease resistance  
637 locus. *Nature Plants* **1** (2015).
- 638 43. J. P. Chen *et al.*, Loss of AvrSr50 by somatic exchange in stem rust leads to virulence for  
639 Sr50 resistance in wheat. *Science* **358**, 1607-+ (2017).
- 640 44. A. Salcedo *et al.*, Variation in the AvrSr35 gene determines Sr35 resistance against  
641 wheat stem rust race Ug99. *Science* **358**, 1604-1606 (2017).
- 642 45. A. Sanchez-Vallet *et al.*, The Genome Biology of Effector Gene Evolution in Filamentous  
643 Plant Pathogens. LID - 10.1146/annurev-phyto-080516-035303 [doi]. (2018).
- 644 46. F. Menardo, C. R. Praz, T. Wicker, B. Keller, Rapid turnover of effectors in grass powdery  
645 mildew (*Blumeria graminis*). *Bmc Evolutionary Biology* **17**, 223 (2017).
- 646 47. J. R. Lowry, D. J. Sammons, P. S. Baenziger, J. G. Moseman, Identification and  
647 characterization of the gene conditioning powdery mildew resistance in Amigo wheat.  
648 *Crop Science* **24**, 129-132 (1984).
- 649 48. D. H. Koo, W. X. Liu, B. Friebe, B. S. Gill, Homoeologous recombination in the presence of  
650 Ph1 gene in wheat. *Chromosoma* **126**, 531-540 (2017).
- 651 49. J. Sanchez-Martin *et al.*, Rapid gene isolation in barley and wheat by mutant  
652 chromosome sequencing. *Genome Biology* **17** (2016).
- 653 50. F. Jupe *et al.*, Resistance gene enrichment sequencing (RenSeq) enables reannotation of  
654 the NB-LRR gene family from sequenced plant genomes and rapid mapping of resistance  
655 loci in segregating populations. *Plant Journal* **76**, 530-544 (2013).

656  
657



658 **Figures and Tables**

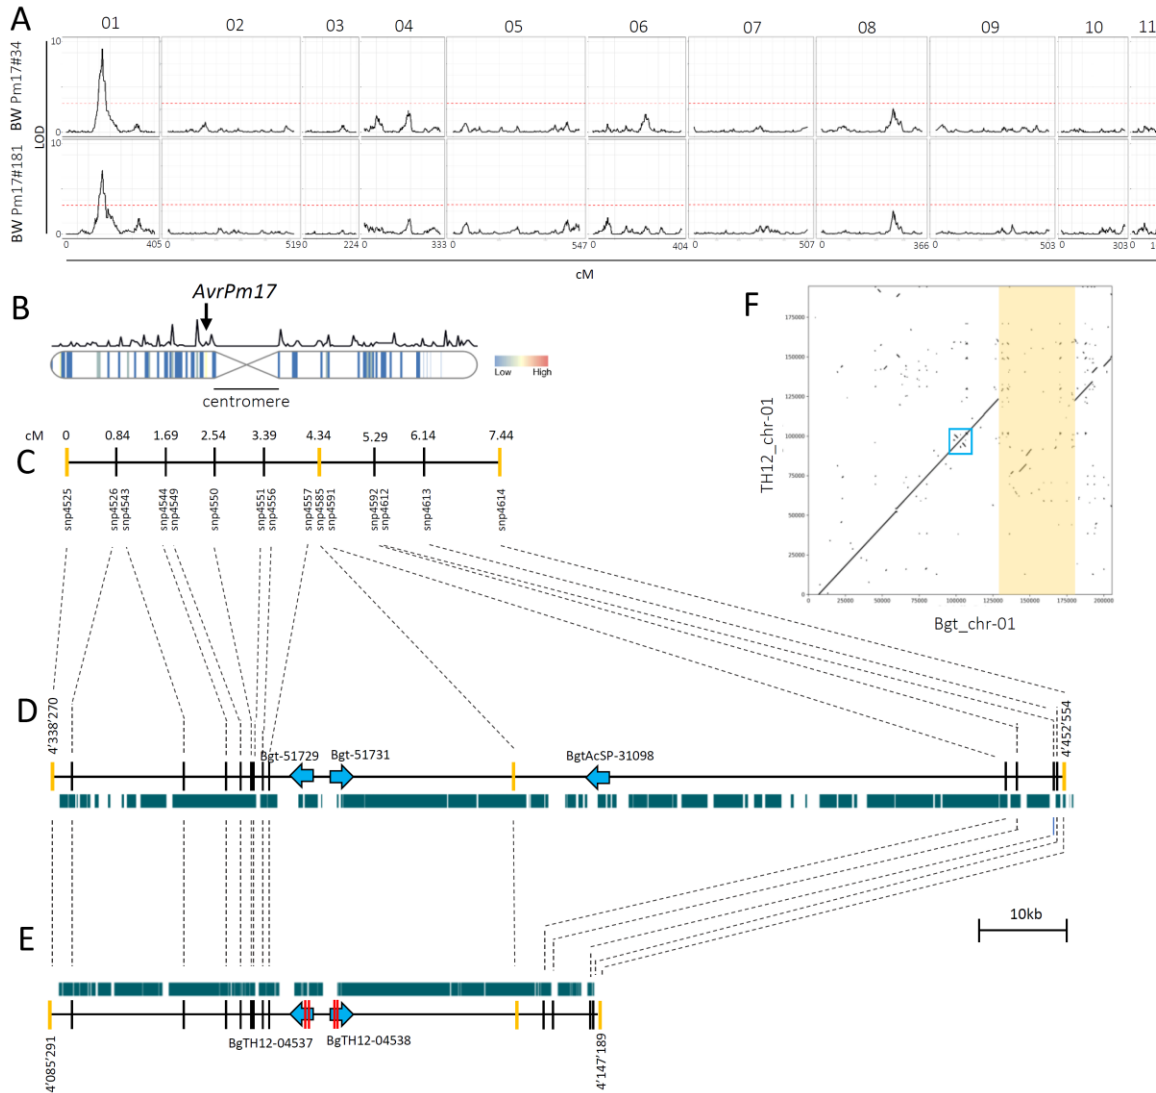

659  
 660 **Figure 1.** Avirulence on wheat genotypes with *Pm17* is controlled by a single locus in a biparental  
 661 mapping population between *B.g. tritici* 96224 X *B.g. triticales* THUN-12. (A) Single interval QTL  
 662 mapping of 55 progeny of the cross 96224X THUN-12 on two transgenic lines expressing *Pm17*-  
 663 HA under control of the maize ubiquitin promoter (Ubi) promoter. The genetic map of Bgt\_96224 X  
 664 THUN-12 based on 119,023 markers was published previously in (31) and contains eleven linkage  
 665 groups that correspond to the eleven chromosomes of *B.g. tritici* 96224 and *B.g. triticales* THUN-12  
 666 ((31), unpublished data) Significance level of the LOD (logarithm of the odds) value was determined  
 667 using 1000 permutations and is indicated by a red line. (B) Location of the QTLs identified in the  
 668 pericentromeric region of chromosome 1 of *B.g. tritici* 96224. The centromeric region is indicated.  
 669 Vertical bars indicate effector gene density in 50kb windows following a gradient indicated in the  
 670 color key.. Line above the chromosome indicates the recombination rate in cM/50kb as described  
 671 in (31). The remaining ten chromosomes are depicted in Fig. S2. (C) Informative markers in the  
 672 7.44 cM genetic confidence interval (1.5LOD) and their cM position relative to the left flanking  
 673 marker. Flanking markers and the best associated marker of the QTL are depicted in yellow. (D-E)  
 674 Physical interval underlying the genetic interval in *B.g. tritici* 96224 (D) and *B.g. triticales* THUN12  
 675 (E). Gene and gene orientation are indicated with blue arrows (gene length not drawn to scale).  
 676 Non-synonymous SNPs in THUN-12 versus isolate 96224 are indicated by a red bar within the  
 677 gene. (D-E) Green bars indicates the presence of transposable elements in the interval. (F)



678 Alignment showing the region flanking 1Mb up and downstream of the *AvrPm17* locus in the  
679 reference assemblies of *B.g. tritici* 96224 and *B.g. triticales* THUN-12. The location of the paralogous  
680 effectors *BgTH12-04537/BgTH12-04538* and *Bgt-51729/Bgt-51731* is indicated by a blue box. The  
681 50kb deletion in THUN-12 compared to 96224 is highlighted in yellow.  
682

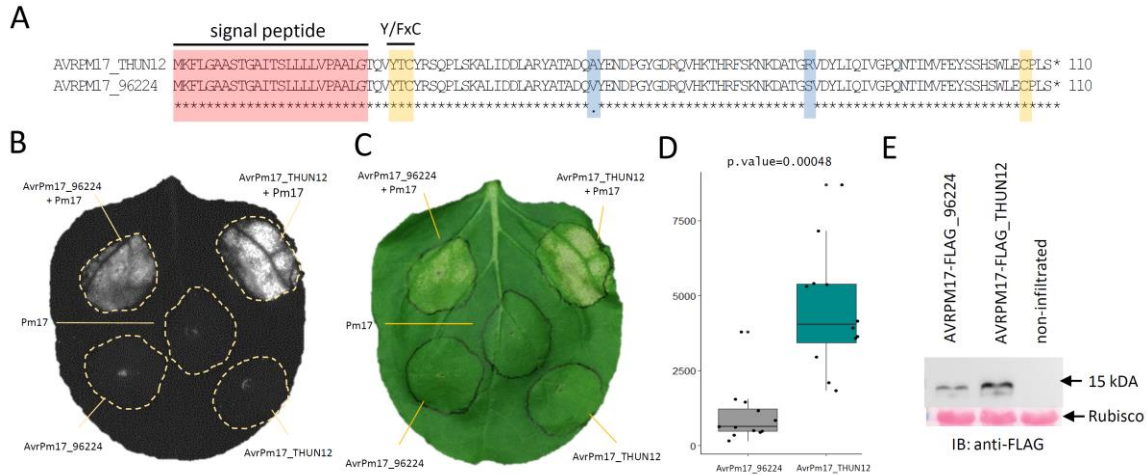

683  
684

685 **Figure 2.** Functional validation of *AvrPm17* in *N. benthamiana* (A) Protein alignment of the  
686 AVRPM17 candidate in THUN-12 and 96224. Predicted signal peptide, Y/FxC motif and C-terminal  
687 cysteine residues are indicated in red and yellow, respectively. Polymorphic amino acid residues  
688 between Bgt\_96224 and THUN-12 are highlighted in blue. (B-C) Co-expression of *Pm17*-HA and  
689 *AvrPm17\_THUN12* (*BgTH12-04537/BgTH12-04538*) and *AvrPm17\_96224* (*Bgt-51729/Bgt-51731*)  
690 by transient *Agrobacterium*-mediated expression in *Nicotiana benthamiana*, imaged by the Fusion  
691 FX imager system (B) or a conventional camera (C). Co-infiltrations were done at a ratio of 1:4  
692 R:Avr. (D) Difference in hypersensitive response induction between the two AVRPM17 variants  
693 AVRPM17\_THUN12 and AVRPM17\_96224 infiltrated in a ratio of R:Avr of 1:1. The p-values of the  
694 paired Wilcoxon-ranked sum test is indicated above the panel. (E) Western blot showing C-terminal  
695 tagged AVRPM17-FLAG variants extracted from *A. tumefaciens* infiltrated leaf areas of *N.*  
696 *benthamiana* at 2dpi.

697

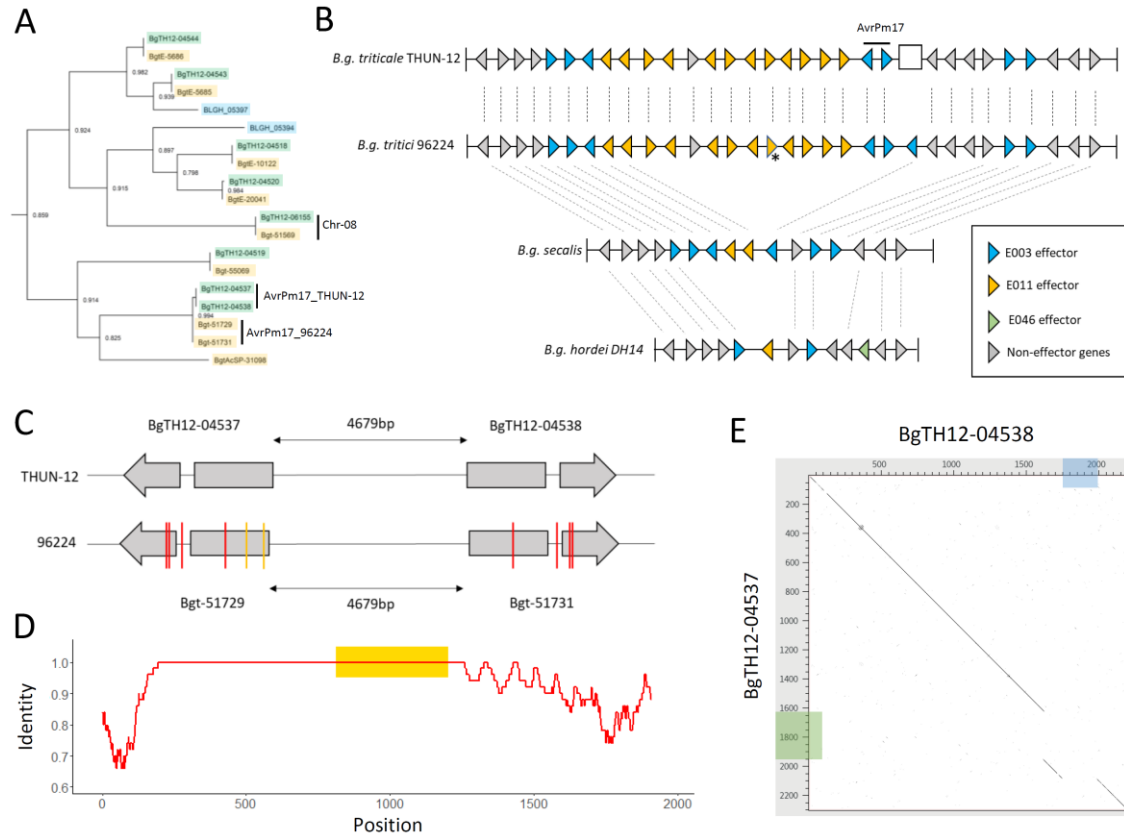

698  
 699 **Figure 3.** *AvrPm17* is a member of a highly expanded effector gene cluster. (A) Phylogenetic  
 700 relationship of the *AvrPm17* effector family. Panel shows subsection of the phylogenetic tree based  
 701 on protein sequences of E003 effector family members of *B.g. tritici* (69 members) *B.g. triticales* (70  
 702 members) and *B.g. hordei* (59 members). The full tree can be found in Fig. S12. Effector family  
 703 members are highlighted as follows: members in *B.g. tritici* in yellow, members in *B.g. triticales*  
 704 in green, and members in *B.g. hordei* in blue. For each branch, the local support values calculated  
 705 with the Shimodaira-Hasegawa test are indicated. (B) Schematic representation of the *AvrPm17*  
 706 effector cluster in the high-quality genomes of *B.g. triticales* THUN-12, *B.g. tritici* 96224, and *B.g.*  
 707 *hordei* DH14. In the absence of a high-quality genome assembly for *B.g. secalis*, presence/absence  
 708 of genes was estimated by coverage analysis based on mappings of five re-sequenced isolates.  
 709 Genes that are present in at least one *B.g. secalis* isolate, where considered as present. Genes  
 710 and their orientation are indicated by triangles. The white rectangle in the *B.g. triticales* THUN-12  
 711 assembly indicates the position of the 50kb deletion presented in Fig. 1F. The gene marked with  
 712 an asterisk represents a collapsed gene duplication in the *B.g. triticales* 96224 assembly. Syntenic  
 713 relationship is indicated by dashed lines. The figure is not drawn to scale. (C-E). The *AvrPm17*  
 714 gene copies have evolved through gene conversion. (C) Analysis of SNPs in the *AvrPm17* gene  
 715 copies in the two parental isolates. SNPs in THUN-12 are shown in comparison to 96224 for which  
 716 both gene copies are identical. The *AvrPm17* genes are represented schematically with grey  
 717 boxes representing the two exons. The transcriptional orientation is indicated by the direction of  
 718 the arrowhead in the second exon. SNPs are indicated in the coding sequences and the intron,  
 719 as well as in regions 100bp up- and downstream of the gene. Red bars represent SNPs that are  
 720 shared between the two gene copies in THUN-12 and yellow lines indicate SNPs that are present  
 721 in only one copy. (D) Visual representation of the duplication of *AvrPm17* in isolate 96224.  
 722 To allow alignment of the two sequences, the insertions in the downstream region of the two  
 723 genes were spliced out. The x-axis shows the alignment position, while the y-axis shows the  
 724 sequence identity calculated in 50bp sliding windows. The position of the *AvrPm17* gene is  
 725 highlighted by a yellow box. (E) Dotplot

726 alignment of the duplicated gene copies and flanking region in the isolate THUN-12. Insertions in  
727 the downstream region of BgTH12-04537 and BgTH12-04538 are highlighted in green and blue,  
728 respectively.

729

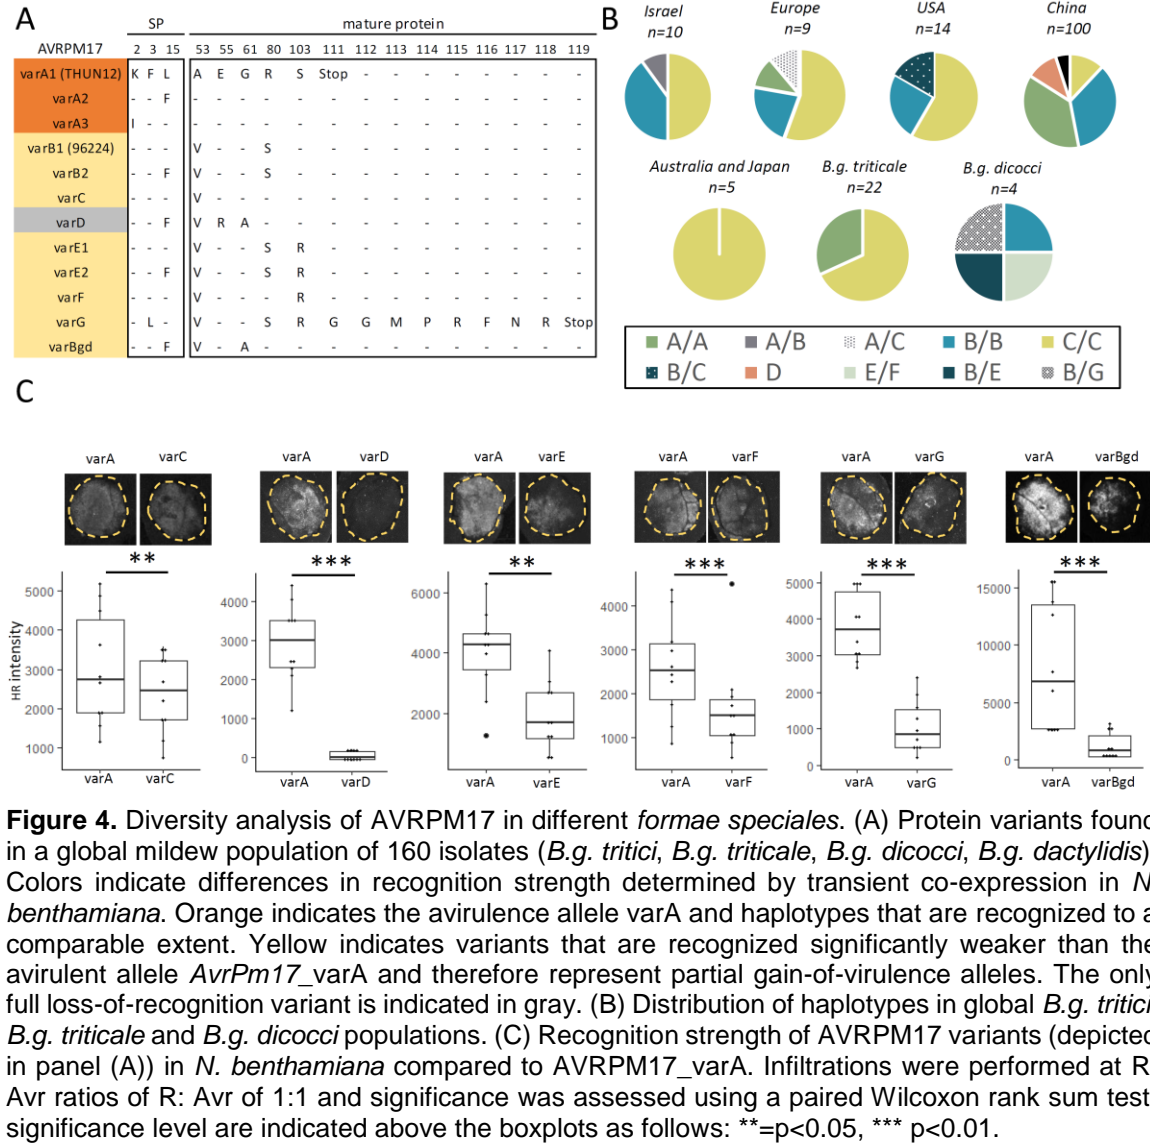

730  
731  
732  
733  
734  
735  
736  
737  
738  
739  
740  
741  
742

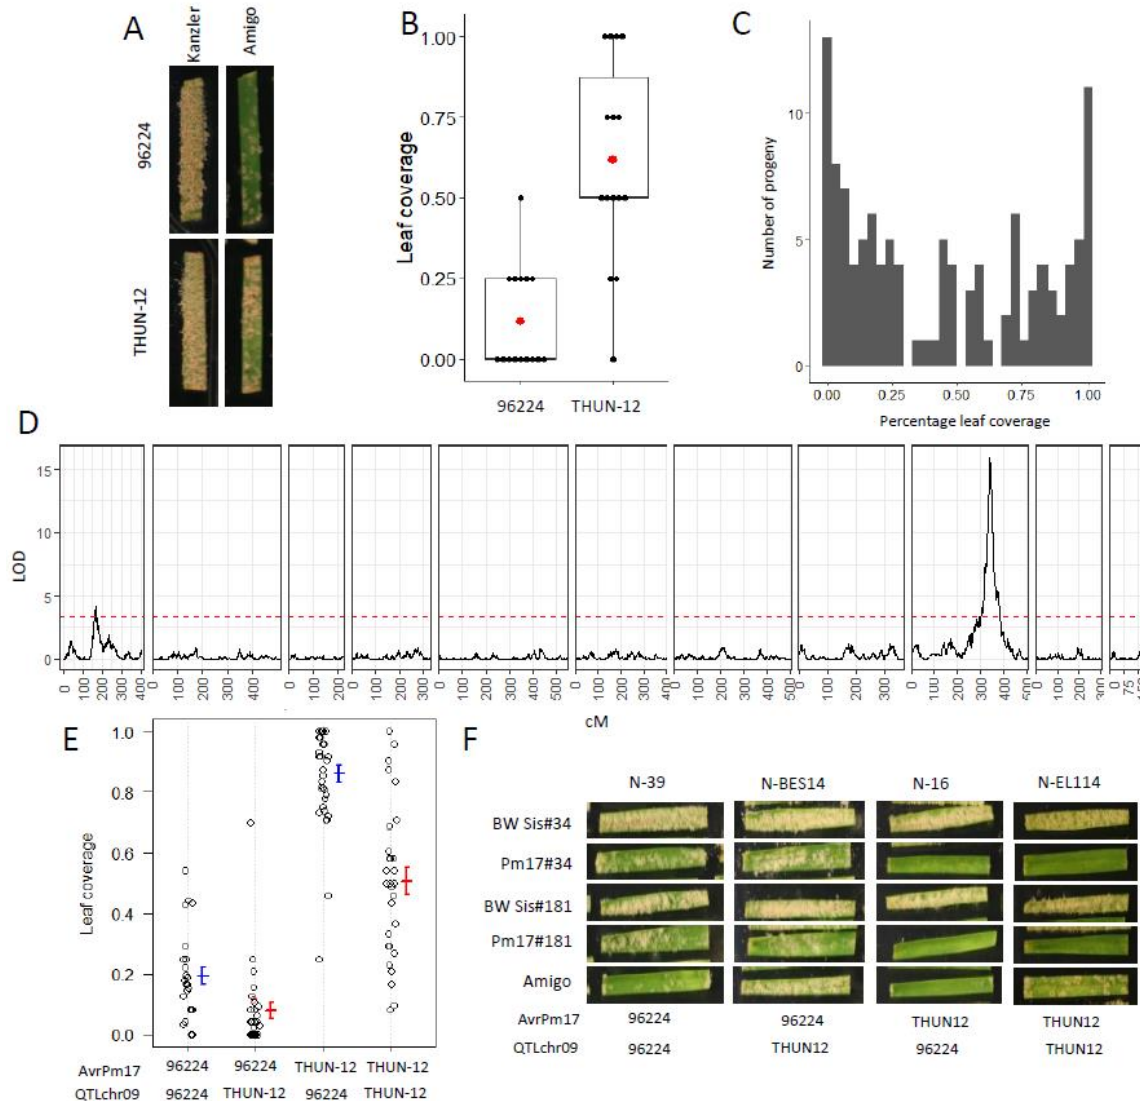

743

744 **Figure 5.** QTL mapping in the Bgt\_96224 X THUN-12 F1 population on the wheat cultivar 'Amigo'  
 745 carrying a 1RS.1AL translocation from 'Insave' rye including the *Pm17* resistance gene. (A)  
 746 Representative photographs of phenotypes of the parental isolates Bgt\_96224 and THUN-12 on  
 747 Amigo at 10dpi. The susceptible wheat cultivar 'Kanzler' was used as an infection control. (B)  
 748 Boxplot summarizing the phenotypes of Bgt\_96224 and THUN-12 on 'Amigo'. Leaf coverage of  
 749 individual leaf segments was scored according to the following scale: avirulent = 0,  
 750 avirulent/intermediate 0.25, intermediate 0.5, intermediate/virulent =0.75, virulent = 0. (C)  
 751 Distribution of phenotypes of the 117 progeny of the cross Bgt\_96224 X THUN-12 on 'Amigo'.  
 752 Progeny phenotypes were scored as described in (B) and the average of at least 6 leaf segments  
 753 for each progeny was plotted (D) Single interval QTL mapping of Bgt\_96224 X THUN-12 on cultivar  
 754 'Amigo'. The black line indicates the LOD (logarithm of the odds) score of the association  
 755 throughout the 11 chromosomes of wheat powdery mildew. Red line indicates the significance  
 756 threshold determined by 1000 permutations. (E) QTL effect plots summarizing phenotypes of the  
 757 117 progeny on 'Amigo'. The phenotypes were plotted based on the genotypes of the best  
 758 associated marker at the QTL location on chromosome 9 (QTLchr09) and chromosome 1  
 759 (AvrPm17 locus). (E) Photographs of representative progeny of the cross Bgt\_96224 X THUN-12  
 760 with different genotype combinations (see E) for the QTLs identified in (D). Phenotypes on wheat  
 761 cultivar 'Amigo' and the transgenic lines expressing *Pm17* at 10dpi are shown.
